# Supplementary material
Source: MDPI journal article supplement (https://www.mdpi.com/2673-2688/4/1/6)

## Supplementary material

**Figure S1: Mean Raman spectra of fungal spores Cb16III, Ca8II, Cb15, Mpemp, Bbass and normalized Grad-CAM indicator of CNN used signatures using a different baseline subtraction procedure as in the actual publication.**

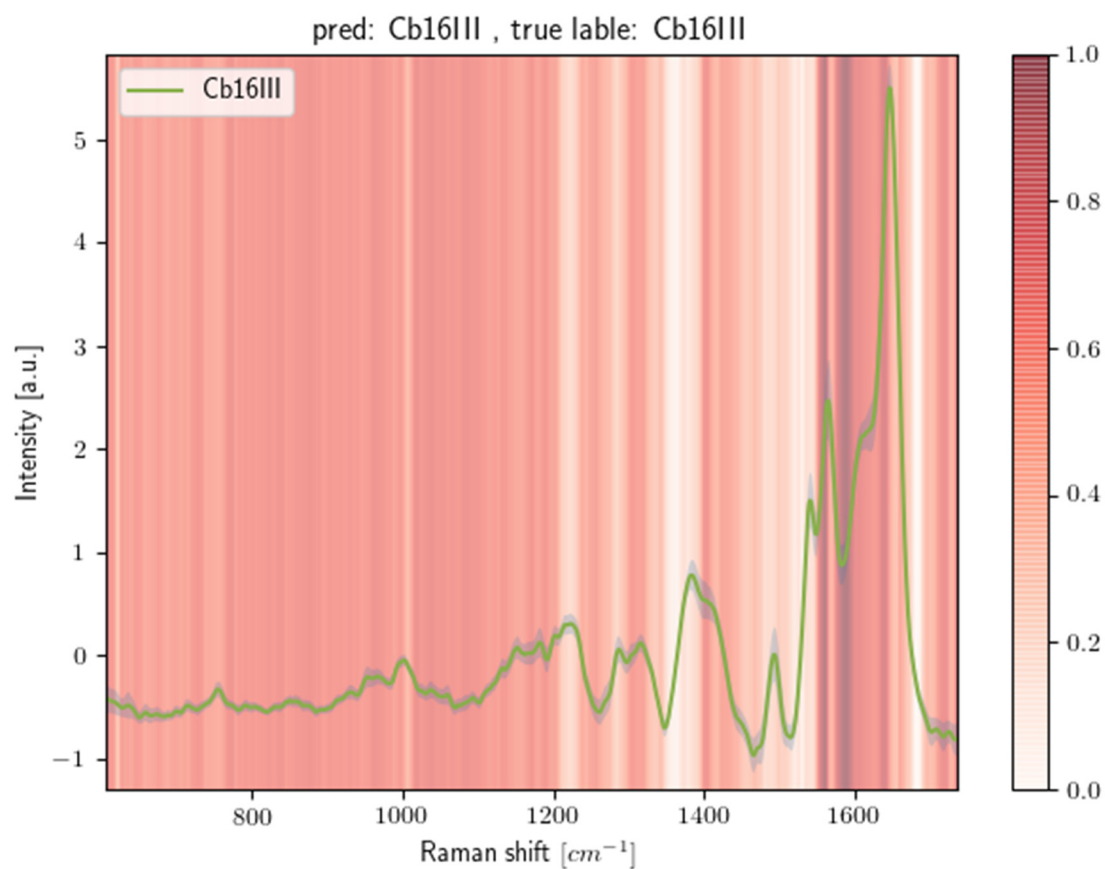

pred: Ca8II , true label: Ca8II

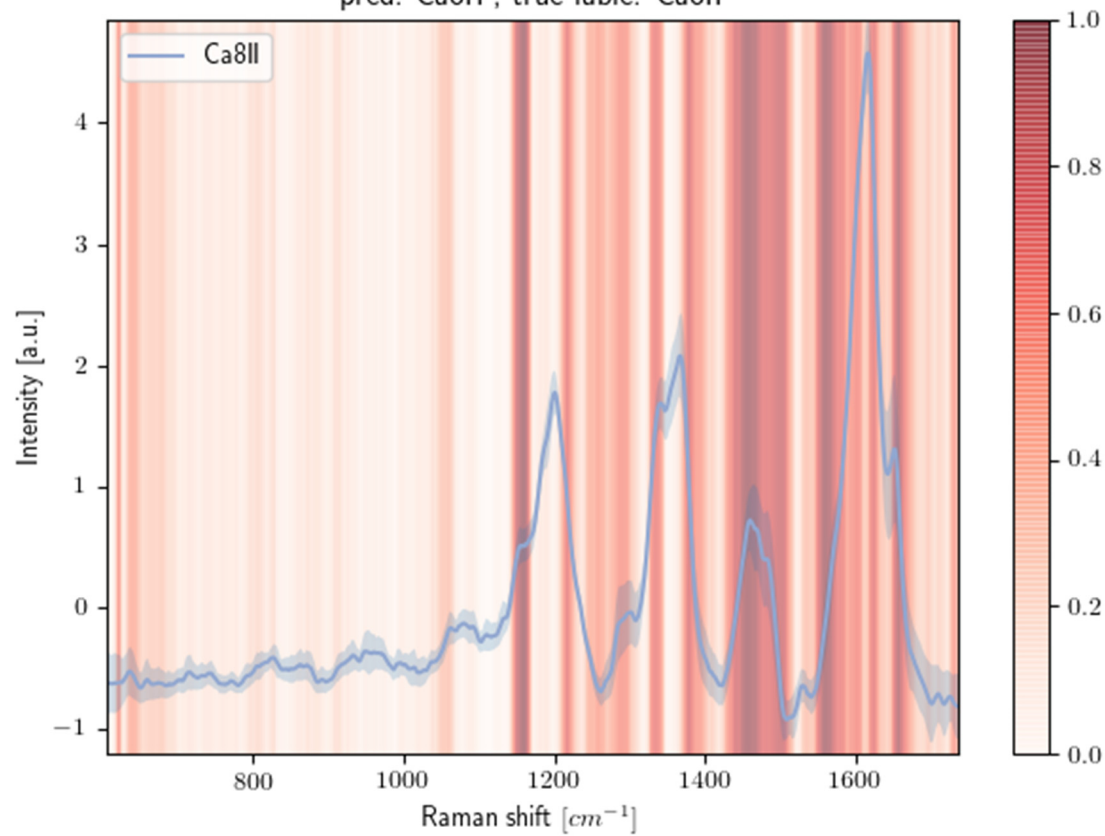

pred: Cb15 , true label: Cb15

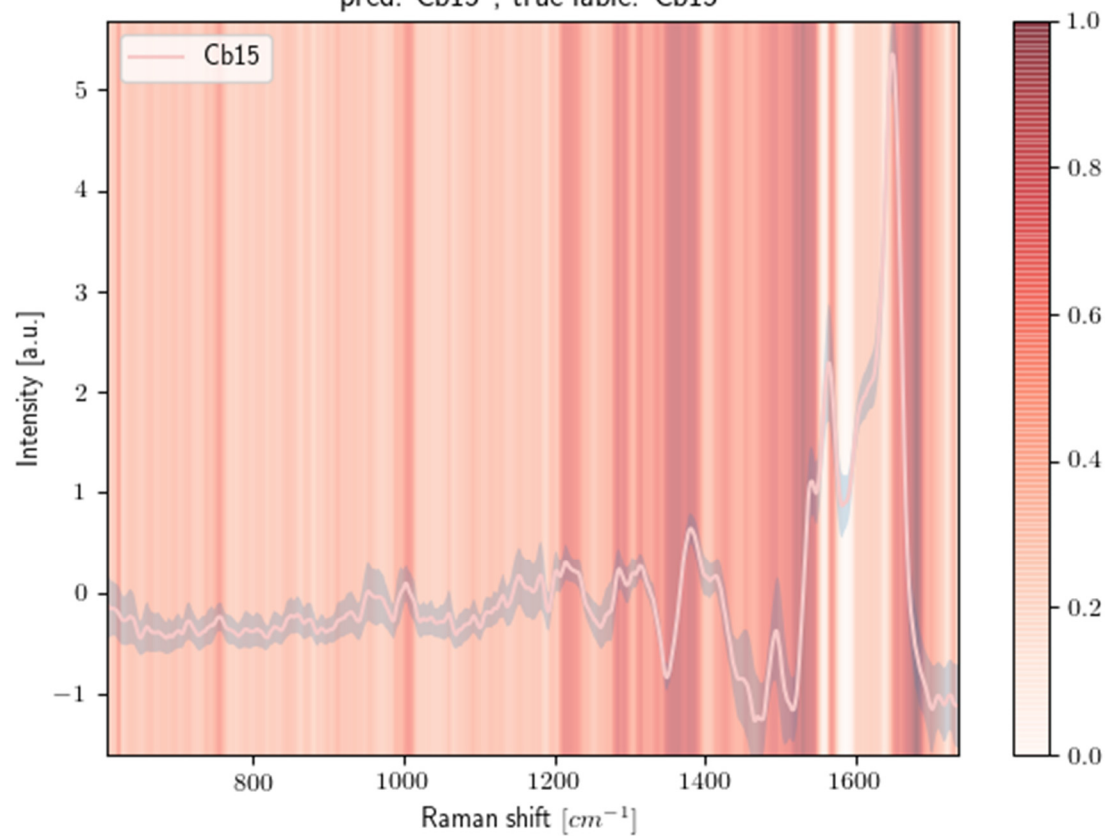

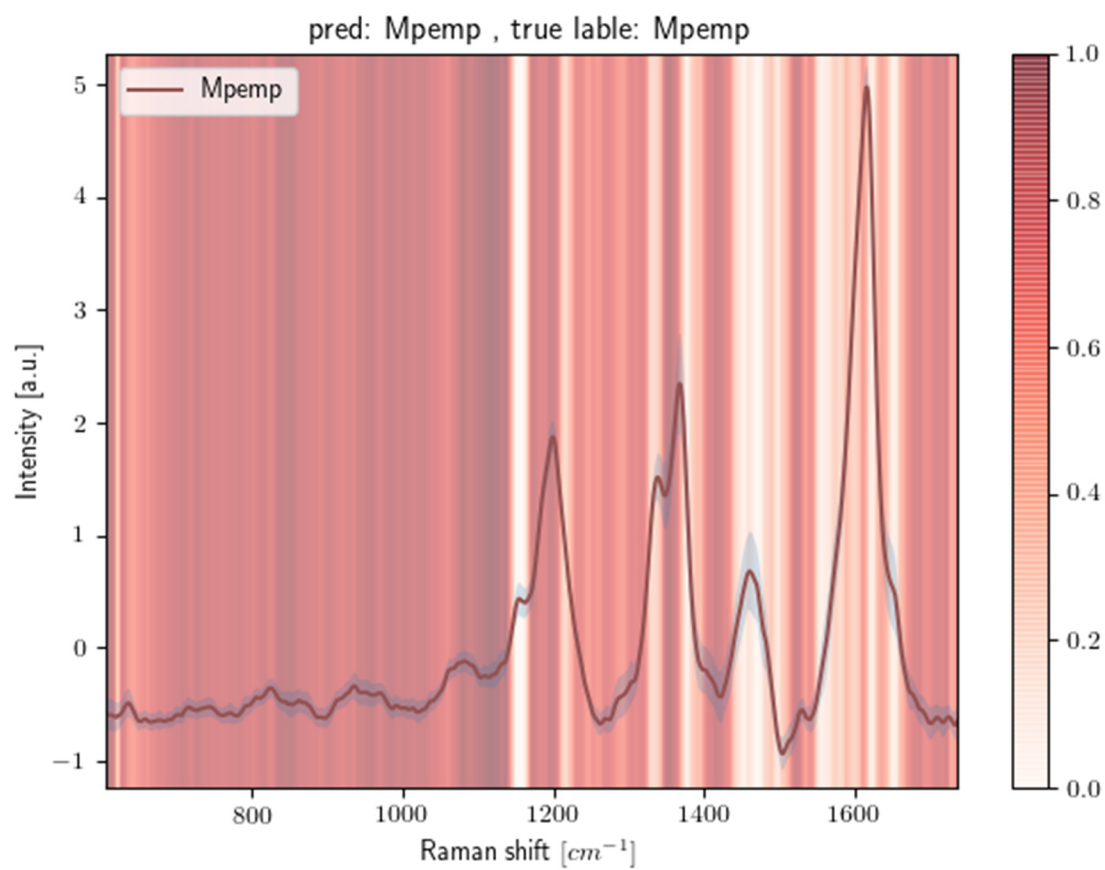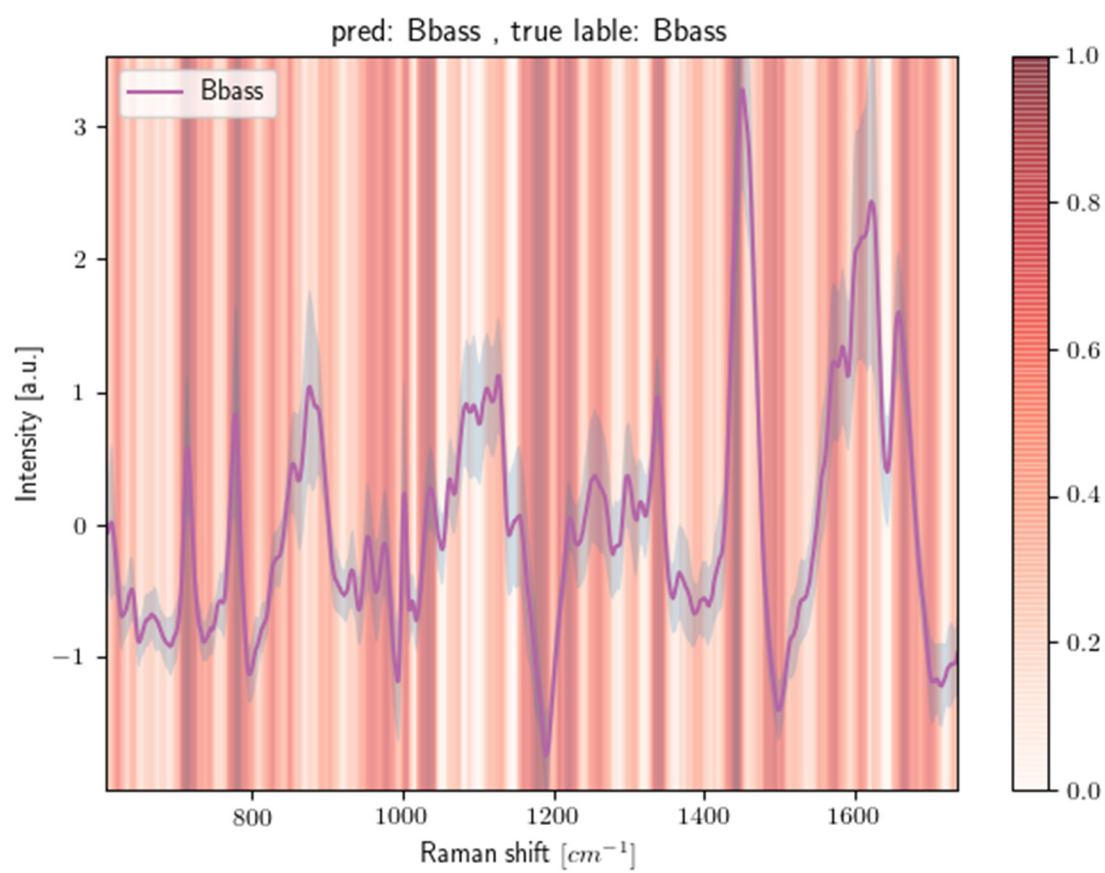

Supplement: s1 [file s1]
